# Supplementary material
Source: PubMed Central journal article supplement (PMC4790788)
Supplement: schh009468.ww1_default.pdf [file schh009468.ww1_default.pdf]

# Appendices

## Appendix 1- Search strategy

### Pubmed query 21-06-2012

("embolism"[MeSH Terms] OR "embolism"[Title/Abstract] OR "emboli"[Title/Abstract] OR "embolic"[Title/Abstract] OR "embolus"[Title/Abstract] OR "pe"[Title/Abstract] OR "dvt"[Title/Abstract] OR "thrombosis"[Title/Abstract] OR "thrombose"[Title/Abstract] OR "thrombosed"[Title/Abstract] OR "thromboemboli"[Title/Abstract] OR "thromboembolic"[Title/Abstract] OR "vte"[Title/Abstract] OR "Venous Thrombosis"[Mesh] OR "Pulmonary Embolism"[Mesh]) AND (d dimer[Substance Name] OR "dimer"[Title/Abstract] OR "fibrinogen"[Title/Abstract] OR "fibrin"[Title/Abstract] OR "fibrin fragment D"[Substance Name]) AND ("aged"[Title/Abstract] OR "elderly"[Title/Abstract] OR "geriatric"[Title/Abstract] OR "nursing home"[Title/Abstract] OR "nursing homes"[Title/Abstract] OR "nursing care"[Title/Abstract] OR "old persons"[Title/Abstract]) OR age group[Title/Abstract] OR "age groups"[Title/Abstract] OR "older adult"[Title/Abstract] OR "older adults"[Title/Abstract] OR "older patient"[Title/Abstract] OR "older patients"[Title/Abstract] OR "senior"[Title/Abstract] OR "seniors"[Title/Abstract] OR "psychogeriatric"[Title/Abstract] OR "psychogeriatrics"[Title/Abstract] OR "elder population"[Title/Abstract] OR "Aged"[Mesh] OR "Health Services for the Aged"[Mesh] OR "Homes for the Aged"[Mesh] OR "Aged, 80 and over"[Mesh] OR "Frail Elderly"[Mesh] OR "Housing for the Elderly"[Mesh] OR "Nursing Homes"[Mesh] OR "Nursing Care"[Mesh] OR "age groups"[Title/Abstract] OR "elderly care"[Title/Abstract])

### Embase query 21-06-2012

(embolism:ab,ti OR emboli:ab,ti OR embolic:ab,ti OR embolus:ab,ti OR pe:ab,ti OR dvt:ab,ti OR thrombosis:ab,ti OR thrombose:ab,ti OR thrombosed:ab,ti OR thromboemboli:ab,ti OR thromboembolic:ab,ti OR vte:ab,ti) AND (dimmer:ab,ti OR fibrinogen:ab,ti OR fibrin:ab,ti) AND [embase]/lim AND (aged:ab,ti OR elderly:ab,ti OR geriatric:ab,ti OR 'nursing home':ab,ti OR 'nursing homes':ab,ti OR 'nursing care':ab,ti OR 'old persons':ab,ti OR 'age group':ab,ti OR 'older adult':ab,ti OR 'older adults':ab,ti OR 'older patient':ab,ti OR 'older patients':ab,ti OR senior:ab,ti OR seniors:ab,ti OR psychogeriatric:ab,ti OR psychogeriatrics:ab,ti OR 'elder population':ab,ti OR 'age groups':ab,ti OR 'elderly care':ab,ti)

## Appendix 2- Flowchart of search strategy and included studies

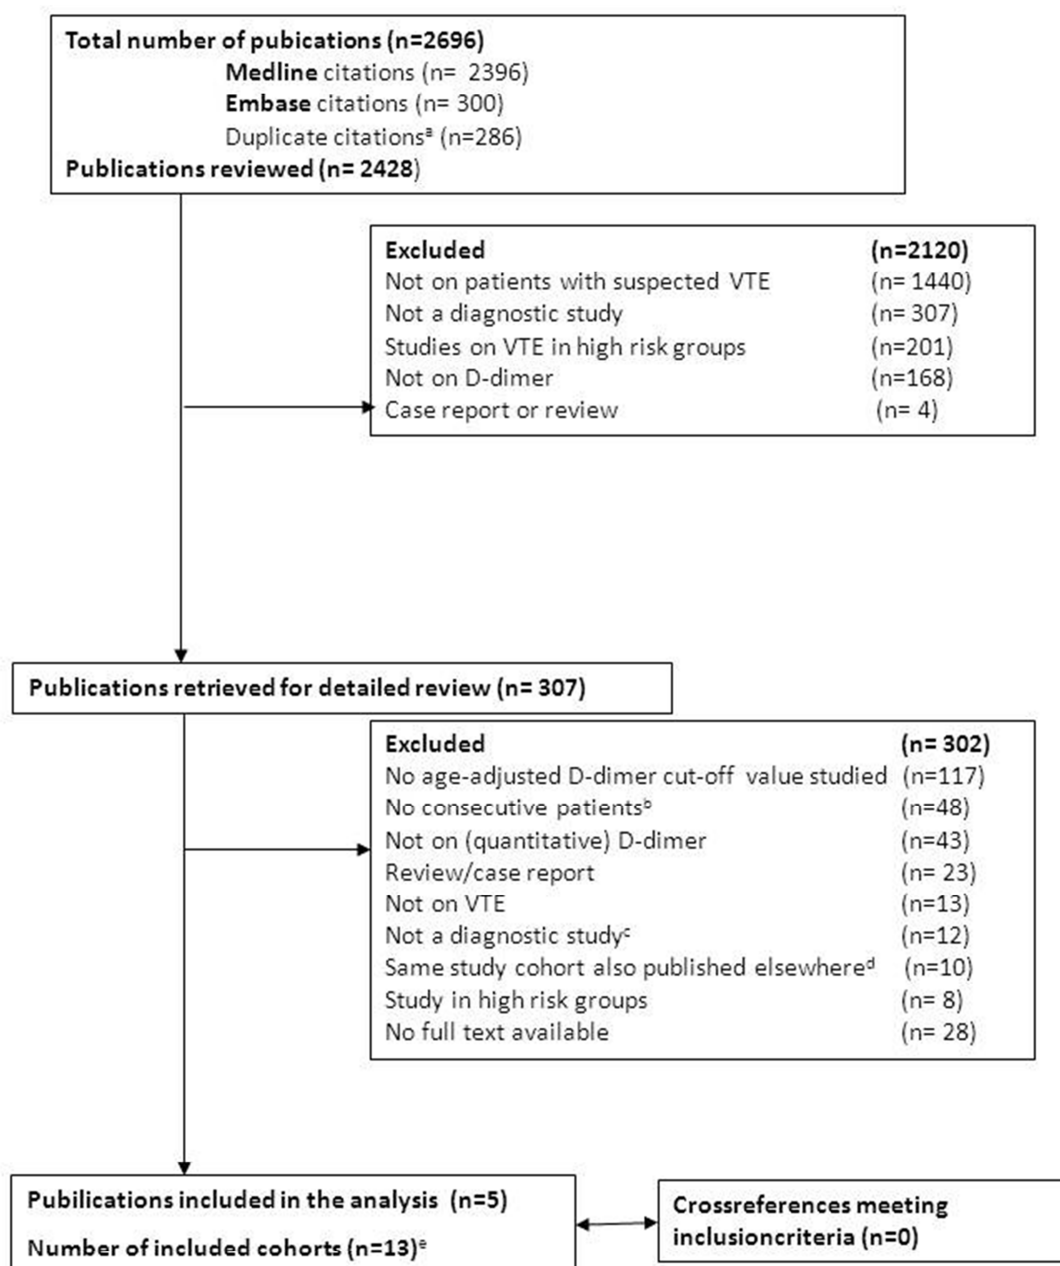

Search June 21<sup>st</sup> 2012.

<sup>a</sup> Duplicates between Medline and Embase or within Medline

<sup>b</sup> These publications concern selected patients; for example, only patients with confirmed pulmonary embolism.

<sup>c</sup> Not a diagnostic, but rather a therapeutic, etiologic or prognostic study

<sup>d</sup> Two citations based on same study population

<sup>e</sup> Three studies separately presented data derived from >1 study population (3, 3 and 5 study populations).

### Appendix 3- Critical appraisal according to the QUADAS-2 tool<sup>27</sup>

| Studycohort <sup>a</sup>                        | Risk of Bias                   |                         |                                 |                              | Concerns regarding Applicability |                         |                                 |
|-------------------------------------------------|--------------------------------|-------------------------|---------------------------------|------------------------------|----------------------------------|-------------------------|---------------------------------|
|                                                 | Patient selection <sup>b</sup> | Index test <sup>c</sup> | Reference standard <sup>d</sup> | Flow and timing <sup>e</sup> | Patient selection <sup>b</sup>   | Index test <sup>c</sup> | Reference standard <sup>d</sup> |
| Douma 2010, Derivation set 6;34                 | Low                            | Low                     | High                            | Low                          | Low                              | Low                     | Low                             |
| Douma 2010 Validation set 2 6;36                | Low                            | Low                     | High                            | Low                          | Low                              | Low                     | Low                             |
| Penaloza 2012, French cohort 16;38              | Low                            | Unclear                 | High                            | High                         | Low                              | Unclear                 | Low                             |
| Penaloza 2012, European cohort 16;37            | Low                            | Unclear                 | High                            | High                         | Low                              | Unclear                 | Low                             |
| Penaloza 2012, USA cohort 16;42                 | High                           | Unclear                 | High                            | Low                          | High                             | Unclear                 | Low                             |
| Douma 2010 Validation set 1 6;35                | Low                            | Low                     | High                            | Low                          | Low                              | Low                     | Low                             |
| Es, van 2012 17;55                              | Low                            | Low                     | High                            | Low                          | Low                              | Unclear                 | Low                             |
| Schouten 2012 18;56                             | Low                            | Low                     | Low                             | Unclear                      | Low                              | Unclear                 | Low                             |
| Douma 2012, cohort 1 7;19                       | Low                            | Low                     | High                            | Low                          | Low                              | Low                     | Low                             |
| Douma 2012, cohort 2 19;31                      | Low                            | Low                     | High                            | Low                          | Low                              | Low                     | Low                             |
| Douma 2012, cohort 3 19;32                      | Low                            | Low                     | High                            | Low                          | Low                              | Low                     | Low                             |
| Douma 2012, cohort 4 19;33                      | High*                          | Low                     | High                            | Low                          | Low                              | Low                     | Low                             |
| Douma 2012, cohort 5 19, 1an et al, unpublished | Low                            | Low                     | High                            | Low                          | Low                              | Unclear                 | Low                             |

- Second given reference refers to primary studies describing the cohort
- If a consecutive sample of patients suspected of having venous thromboembolism was enrolled, the risk of bias was considered low. Studies including only patients in whom D-dimer testing and/or imaging investigations were performed or wherein >10% of patients were excluded using inappropriate exclusion criteria (e.g. unable to follow up)\* were considered as having a high risk of bias. If there were concerns that the patients included in the study would differ from patients that are targeted by the review question, applicability concerns were considered high.
- If there was no room for subjective interpretation of the index-test (D-dimer result), the risk of bias was considered low. If there was no clear description of the type of D-dimer assay used, the risk of bias was considered unclear. For cohorts wherein two or more D-dimer assays were used from which results were presented unstratified, the applicability was considered unclear.
- If all patients in the sample underwent imaging investigation (reference standard), the risk of bias was considered low. However, if only patients with a high D-dimer test and/or a non-high clinical probability underwent imaging investigation, the risk of (differential verification) bias was considered high.
- If all patients who were enrolled in the studies were presented in the 2x2 tables, the risk of bias was considered low. If D-dimer results were missing for 10% or more of the enrolled patients, the risk of bias was 'unclear'. The risk of bias was considered high if not all patients underwent the same algorithm of reference testing.

# Appendix 4- Sensitivity and specificity of individual included cohorts, with prevalence, pre-test probability and applied D-dimer assay.

## D-dimer tests in patients aged <= 50, cut-off 500 ug/L

| Study                      | TP | FP  | FN | TN   | PE or DVT | setting             | assay                                  | Prevalence | Sensitivity (95% CI) | Specificity (95% CI) | Sensitivity (95% CI) | Specificity (95% CI) |
|----------------------------|----|-----|----|------|-----------|---------------------|----------------------------------------|------------|----------------------|----------------------|----------------------|----------------------|
| Douma 2012, cohort 4       | 6  | 32  | 1  | 79   | DVT       | outpatients         | Quantitative latex agglutination assay | 10.0       | 0.86 [0.42, 1.00]    | 0.71 [0.62, 0.79]    |                      |                      |
| Douma 2012, cohort 2       | 17 | 56  | 2  | 66   | DVT       | outpatients         | Quantitative latex agglutination assay | 23.0       | 0.89 [0.67, 0.99]    | 0.54 [0.45, 0.63]    |                      |                      |
| Douma 2012, cohort 1       | 53 | 53  | 1  | 82   | DVT       | outpatients         | Quantitative latex agglutination assay | 39.0       | 0.98 [0.90, 1.00]    | 0.61 [0.52, 0.69]    |                      |                      |
| Douma 2012, cohort 3       | 10 | 9   | 0  | 35   | DVT       | outpatients         | Quantitative latex agglutination assay | 23.0       | 1.00 [0.69, 1.00]    | 0.80 [0.65, 0.90]    |                      |                      |
| Schouten, 2012             | 30 | 80  | 1  | 130  | DVT       | primary care        | Quantitative latex or ELFA             | 19.7       | 0.97 [0.83, 1.00]    | 0.62 [0.55, 0.69]    |                      |                      |
| Es, van 2012               | 33 | 120 | 0  | 124  | PE        | in- and outpatients | Quantitative latex agglutination assay | 27.0       | 1.00 [0.89, 1.00]    | 0.51 [0.44, 0.57]    |                      |                      |
| Douma 2010, valid.set 1    | 91 | 339 | 2  | 687  | PE        | in- and outpatients | Quantitative latex or ELFA             | 20.4       | 0.98 [0.92, 1.00]    | 0.67 [0.64, 0.70]    |                      |                      |
| Penaloza 2012, Eur cohort  | 30 | 66  | 0  | 116  | PE        | outpatients         | Quantitative latex or ELFA             | 18.0       | 1.00 [0.88, 1.00]    | 0.64 [0.56, 0.71]    |                      |                      |
| Penaloza 2012, French coh  | 8  | 74  | 0  | 177  | PE        | outpatients         | Quantitative latex or ELFA             | 28.0       | 1.00 [0.63, 1.00]    | 0.71 [0.64, 0.76]    |                      |                      |
| Douma 2010, derivationsset | 49 | 153 | 0  | 266  | PE        | outpatients         | ELFA                                   | 24.2       | 1.00 [0.93, 1.00]    | 0.63 [0.59, 0.68]    |                      |                      |
| Douma 2010, valid.set 2    | 69 | 169 | 0  | 307  | PE        | outpatients         | ELFA                                   | 20.7       | 1.00 [0.95, 1.00]    | 0.64 [0.60, 0.69]    |                      |                      |
| Penaloza 2012, USA cohort  | 61 | 575 | 7  | 1262 | PE        | outpatients         | Mixed assays                           | 5.1        | 0.90 [0.80, 0.96]    | 0.69 [0.67, 0.71]    |                      |                      |

## D-dimer tests in patients aged 51-60, cut-off 500 ug/L

| Study                      | TP | FP  | FN | TN  | PE or DVT | setting             | assay                                  | Prevalence | Sensitivity (95% CI) | Specificity (95% CI) | Sensitivity (95% CI) | Specificity (95% CI) |
|----------------------------|----|-----|----|-----|-----------|---------------------|----------------------------------------|------------|----------------------|----------------------|----------------------|----------------------|
| Douma 2012, cohort 1       | 31 | 25  | 0  | 37  | DVT       | outpatients         | Quantitative latex agglutination assay | 39.0       | 1.00 [0.89, 1.00]    | 0.60 [0.46, 0.72]    |                      |                      |
| Douma 2012, cohort 2       | 11 | 27  | 0  | 26  | DVT       | outpatients         | Quantitative latex agglutination assay | 23.0       | 1.00 [0.72, 1.00]    | 0.49 [0.35, 0.63]    |                      |                      |
| Douma 2012, cohort 3       | 4  | 8   | 0  | 22  | DVT       | outpatients         | Quantitative latex agglutination assay | 23.0       | 1.00 [0.40, 1.00]    | 0.73 [0.54, 0.88]    |                      |                      |
| Douma 2012, cohort 4       | 4  | 22  | 0  | 54  | DVT       | outpatients         | Quantitative latex agglutination assay | 10.0       | 1.00 [0.40, 1.00]    | 0.71 [0.60, 0.81]    |                      |                      |
| Schouten, 2012             | 15 | 52  | 0  | 59  | DVT       | primary care        | Quantitative latex or ELFA             | 19.7       | 1.00 [0.78, 1.00]    | 0.53 [0.43, 0.63]    |                      |                      |
| Douma 2010, valid.set 1    | 52 | 146 | 0  | 160 | PE        | in- and outpatients | Quantitative latex or ELFA             | 20.4       | 1.00 [0.93, 1.00]    | 0.52 [0.47, 0.58]    |                      |                      |
| Es, van 2012               | 14 | 50  | 0  | 33  | PE        | in- and outpatients | Quantitative latex agglutination assay | 27.0       | 1.00 [0.77, 1.00]    | 0.40 [0.29, 0.51]    |                      |                      |
| Penaloza 2012, USA cohort  | 30 | 193 | 0  | 311 | PE        | outpatients         | Mixed assays                           | 5.1        | 1.00 [0.88, 1.00]    | 0.62 [0.57, 0.66]    |                      |                      |
| Penaloza 2012, French coh  | 14 | 34  | 0  | 65  | PE        | outpatients         | Quantitative latex or ELFA             | 28.0       | 1.00 [0.77, 1.00]    | 0.66 [0.55, 0.75]    |                      |                      |
| Douma 2010, derivationsset | 21 | 71  | 0  | 97  | PE        | outpatients         | ELFA                                   | 24.2       | 1.00 [0.84, 1.00]    | 0.58 [0.50, 0.65]    |                      |                      |
| Penaloza 2012, Eur cohort  | 17 | 45  | 0  | 41  | PE        | outpatients         | Quantitative latex or ELFA             | 18.0       | 1.00 [0.80, 1.00]    | 0.48 [0.37, 0.59]    |                      |                      |
| Douma 2010, valid.set 2    | 45 | 97  | 0  | 110 | PE        | outpatients         | ELFA                                   | 20.7       | 1.00 [0.92, 1.00]    | 0.53 [0.46, 0.60]    |                      |                      |

## D-dimer tests in patients aged 51-60, cut-off age\*10 ug/L

| Study                      | TP | FP  | FN | TN  | PE or DVT | setting             | assay                                  | Prevalence | Sensitivity (95% CI) | Specificity (95% CI) | Sensitivity (95% CI) | Specificity (95% CI) |
|----------------------------|----|-----|----|-----|-----------|---------------------|----------------------------------------|------------|----------------------|----------------------|----------------------|----------------------|
| Douma 2012, cohort 4       | 4  | 18  | 0  | 58  | DVT       | outpatients         | Quantitative latex agglutination assay | 10.0       | 1.00 [0.40, 1.00]    | 0.76 [0.65, 0.85]    |                      |                      |
| Douma 2012, cohort 1       | 31 | 23  | 0  | 39  | DVT       | outpatients         | Quantitative latex agglutination assay | 39.0       | 1.00 [0.89, 1.00]    | 0.63 [0.50, 0.75]    |                      |                      |
| Douma 2012, cohort 2       | 11 | 23  | 0  | 30  | DVT       | outpatients         | Quantitative latex agglutination assay | 23.0       | 1.00 [0.72, 1.00]    | 0.57 [0.42, 0.70]    |                      |                      |
| Douma 2012, cohort 3       | 4  | 7   | 0  | 23  | DVT       | outpatients         | Quantitative latex agglutination assay | 23.0       | 1.00 [0.40, 1.00]    | 0.77 [0.58, 0.90]    |                      |                      |
| Schouten, 2012             | 14 | 48  | 1  | 63  | DVT       | primary care        | Quantitative latex or ELFA             | 19.7       | 0.93 [0.68, 1.00]    | 0.57 [0.47, 0.66]    |                      |                      |
| Es, van 2012               | 14 | 49  | 0  | 34  | PE        | in- and outpatients | Quantitative latex agglutination assay | 27.0       | 1.00 [0.77, 1.00]    | 0.41 [0.30, 0.52]    |                      |                      |
| Douma 2010, valid.set 1    | 51 | 128 | 1  | 178 | PE        | in- and outpatients | Quantitative latex or ELFA             | 20.4       | 0.98 [0.90, 1.00]    | 0.58 [0.52, 0.64]    |                      |                      |
| Douma 2010, valid.set 2    | 45 | 92  | 0  | 115 | PE        | outpatients         | ELFA                                   | 20.7       | 1.00 [0.92, 1.00]    | 0.56 [0.49, 0.62]    |                      |                      |
| Douma 2010, derivationsset | 21 | 66  | 0  | 102 | PE        | outpatients         | ELFA                                   | 24.2       | 1.00 [0.84, 1.00]    | 0.61 [0.53, 0.68]    |                      |                      |
| Penaloza 2012, USA cohort  | 30 | 166 | 0  | 338 | PE        | outpatients         | Mixed assays                           | 5.1        | 1.00 [0.88, 1.00]    | 0.67 [0.63, 0.71]    |                      |                      |
| Penaloza 2012, Eur cohort  | 6  | 23  | 0  | 14  | PE        | outpatients         | Quantitative latex or ELFA             | 18.0       | 1.00 [0.54, 1.00]    | 0.38 [0.22, 0.55]    |                      |                      |
| Penaloza 2012, French coh  | 14 | 30  | 0  | 69  | PE        | outpatients         | Quantitative latex or ELFA             | 28.0       | 1.00 [0.77, 1.00]    | 0.70 [0.60, 0.79]    |                      |                      |

## D-dimer tests in patients aged 61-70, cut-off 500 ug/L

| Study                      | TP | FP  | FN | TN  | PE or DVT | setting             | assay                                  | Prevalence | Sensitivity (95% CI) | Specificity (95% CI) | Sensitivity (95% CI) | Specificity (95% CI) |
|----------------------------|----|-----|----|-----|-----------|---------------------|----------------------------------------|------------|----------------------|----------------------|----------------------|----------------------|
| Douma 2012, cohort 3       | 5  | 21  | 0  | 31  | DVT       | outpatients         | Quantitative latex agglutination assay | 23.0       | 1.00 [0.48, 1.00]    | 0.60 [0.45, 0.73]    |                      |                      |
| Douma 2012, cohort 4       | 13 | 29  | 0  | 67  | DVT       | outpatients         | Quantitative latex agglutination assay | 10.0       | 1.00 [0.75, 1.00]    | 0.64 [0.54, 0.74]    |                      |                      |
| Douma 2012, cohort 1       | 17 | 28  | 0  | 20  | DVT       | outpatients         | Quantitative latex agglutination assay | 39.0       | 1.00 [0.80, 1.00]    | 0.42 [0.28, 0.57]    |                      |                      |
| Douma 2012, cohort 2       | 12 | 44  | 0  | 21  | DVT       | outpatients         | Quantitative latex agglutination assay | 23.0       | 1.00 [0.74, 1.00]    | 0.32 [0.21, 0.45]    |                      |                      |
| Douma 2012, cohort 5       | 6  | 26  | 0  | 11  | DVT       | outpatients         | Quantitative latex agglutination assay | 37.0       | 1.00 [0.54, 1.00]    | 0.30 [0.16, 0.47]    |                      |                      |
| Schouten, 2012             | 13 | 59  | 1  | 34  | DVT       | primary care        | Quantitative latex or ELFA             | 19.7       | 0.93 [0.66, 1.00]    | 0.37 [0.27, 0.47]    |                      |                      |
| Es, van 2012               | 18 | 63  | 1  | 18  | PE        | in- and outpatients | Quantitative latex agglutination assay | 27.0       | 0.95 [0.74, 1.00]    | 0.22 [0.14, 0.33]    |                      |                      |
| Douma 2010, valid.set 1    | 50 | 151 | 0  | 69  | PE        | in- and outpatients | Quantitative latex or ELFA             | 20.4       | 1.00 [0.93, 1.00]    | 0.31 [0.25, 0.38]    |                      |                      |
| Penaloza 2012, Eur cohort  | 26 | 48  | 1  | 28  | PE        | outpatients         | Quantitative latex or ELFA             | 18.0       | 0.96 [0.81, 1.00]    | 0.37 [0.26, 0.49]    |                      |                      |
| Penaloza 2012, French coh  | 7  | 34  | 0  | 32  | PE        | outpatients         | Quantitative latex or ELFA             | 28.0       | 1.00 [0.59, 1.00]    | 0.48 [0.36, 0.61]    |                      |                      |
| Douma 2010, derivationsset | 33 | 115 | 0  | 63  | PE        | outpatients         | ELFA                                   | 24.2       | 1.00 [0.89, 1.00]    | 0.35 [0.28, 0.43]    |                      |                      |
| Douma 2010, valid.set 2    | 48 | 133 | 0  | 79  | PE        | outpatients         | ELFA                                   | 20.7       | 1.00 [0.93, 1.00]    | 0.37 [0.31, 0.44]    |                      |                      |
| Penaloza 2012, USA cohort  | 21 | 171 | 0  | 127 | PE        | outpatients         | Mixed assays                           | 5.1        | 1.00 [0.84, 1.00]    | 0.43 [0.37, 0.48]    |                      |                      |

## D-dimer tests in patients aged 61-70, cut-off age\*10 ug/L

| Study                     | TP | FP  | FN | TN  | PE or DVT | setting             | assay                                  | Prevalence | Sensitivity (95% CI) | Specificity (95% CI) | Sensitivity (95% CI) | Specificity (95% CI) |
|---------------------------|----|-----|----|-----|-----------|---------------------|----------------------------------------|------------|----------------------|----------------------|----------------------|----------------------|
| Douma 2012, cohort 4      | 13 | 29  | 0  | 75  | DVT       | outpatients         | Quantitative latex agglutination assay | 10.0       | 1.00 [0.75, 1.00]    | 0.72 [0.62, 0.80]    |                      |                      |
| Douma 2012, cohort 3      | 4  | 15  | 1  | 37  | DVT       | outpatients         | Quantitative latex agglutination assay | 23.0       | 0.80 [0.28, 0.99]    | 0.71 [0.57, 0.83]    |                      |                      |
| Douma 2012, cohort 5      | 6  | 23  | 0  | 14  | DVT       | outpatients         | Quantitative latex agglutination assay | 37.0       | 1.00 [0.54, 1.00]    | 0.38 [0.22, 0.55]    |                      |                      |
| Douma 2012, cohort 2      | 12 | 35  | 0  | 30  | DVT       | outpatients         | Quantitative latex agglutination assay | 23.0       | 1.00 [0.74, 1.00]    | 0.46 [0.34, 0.59]    |                      |                      |
| Douma 2012, cohort 1      | 17 | 23  | 0  | 25  | DVT       | outpatients         | Quantitative latex agglutination assay | 39.0       | 1.00 [0.80, 1.00]    | 0.52 [0.37, 0.67]    |                      |                      |
| Schouten, 2012            | 13 | 52  | 1  | 41  | DVT       | primary care        | Quantitative latex or ELFA             | 19.7       | 0.93 [0.66, 1.00]    | 0.44 [0.34, 0.55]    |                      |                      |
| Es, van 2012              | 18 | 53  | 1  | 28  | PE        | in- and outpatients | Quantitative latex agglutination assay | 27.0       | 0.95 [0.74, 1.00]    | 0.35 [0.24, 0.46]    |                      |                      |
| Douma 2010, valid.set 1   | 48 | 126 | 2  | 94  | PE        | in- and outpatients | Quantitative latex or ELFA             | 20.4       | 0.96 [0.86, 1.00]    | 0.43 [0.36, 0.50]    |                      |                      |
| Penaloza 2012, French coh | 5  | 31  | 2  | 35  | PE        | outpatients         | Quantitative latex or ELFA             | 28.0       | 0.71 [0.29, 0.96]    | 0.53 [0.40, 0.65]    |                      |                      |
| Penaloza 2012, Eur cohort | 26 | 42  | 1  | 34  | PE        | outpatients         | Quantitative latex or ELFA             | 18.0       | 0.96 [0.81, 1.00]    | 0.45 [0.33, 0.57]    |                      |                      |
| Penaloza 2012, USA cohort | 21 | 135 | 0  | 163 | PE        | outpatients         | Mixed assays                           | 5.1        | 1.00 [0.84, 1.00]    | 0.55 [0.49, 0.60]    |                      |                      |

## Appendix 4- Sensitivity and specificity of individual included cohorts, with prevalence, pre-test probability and applied D-dimer assay- continued

D-dimer test in patients aged 71-80, cut-off 500 ug/L

| Study                     | TP | FP  | FN | TN | PE or DVT | setting             | assay                                 | Prevalence | Sensitivity       | Specificity       |
|---------------------------|----|-----|----|----|-----------|---------------------|---------------------------------------|------------|-------------------|-------------------|
| Douma 2012, cohort 3      | 21 | 41  | 0  | 30 | DVT       | outpatients         | Quantitative latex aglutination assay | 23.0       | 1.00 [0.84, 1.00] | 0.42 [0.31, 0.55] |
| Douma 2012, cohort 2      | 13 | 48  | 0  | 11 | DVT       | outpatients         | Quantitative latex aglutination assay | 23.0       | 1.00 [0.75, 1.00] | 0.19 [0.10, 0.31] |
| Douma 2012, cohort 1      | 17 | 44  | 0  | 18 | DVT       | outpatients         | Quantitative latex aglutination assay | 39.0       | 1.00 [0.80, 1.00] | 0.29 [0.18, 0.42] |
| Douma 2012, cohort 4      | 8  | 50  | 0  | 60 | DVT       | outpatients         | Quantitative latex aglutination assay | 10.0       | 1.00 [0.63, 1.00] | 0.55 [0.45, 0.64] |
| Douma 2012, cohort 5      | 3  | 9   | 0  | 2  | DVT       | outpatients         | Quantitative latex aglutination assay | 37.0       | 1.00 [0.29, 1.00] | 0.18 [0.02, 0.52] |
| Schouten, 2012            | 14 | 63  | 0  | 34 | DVT       | primary care        | Quantitative latex or ELFA            | 19.7       | 1.00 [0.77, 1.00] | 0.35 [0.26, 0.45] |
| Douma 2010, valid.set 1   | 41 | 164 | 0  | 40 | PE        | in- and outpatients | Quantitative latex or ELFA            | 20.4       | 1.00 [0.91, 1.00] | 0.20 [0.14, 0.26] |
| Es, van 2012              | 17 | 45  | 0  | 7  | PE        | in- and outpatients | Quantitative latex aglutination assay | 27.0       | 1.00 [0.80, 1.00] | 0.13 [0.06, 0.26] |
| Douma 2010, derivationset | 58 | 167 | 0  | 40 | PE        | outpatients         | ELFA                                  | 24.2       | 1.00 [0.94, 1.00] | 0.19 [0.14, 0.25] |
| Douma 2010, valid.set 2   | 85 | 205 | 0  | 43 | PE        | outpatients         | ELFA                                  | 20.7       | 1.00 [0.96, 1.00] | 0.17 [0.13, 0.23] |
| Penaloza 2012, Eur cohort | 48 | 76  | 1  | 17 | PE        | outpatients         | Quantitative latex or ELFA            | 18.0       | 0.98 [0.89, 1.00] | 0.18 [0.11, 0.28] |
| Penaloza 2012, French coh | 21 | 56  | 2  | 14 | PE        | outpatients         | Quantitative latex or ELFA            | 20.0       | 0.91 [0.72, 0.99] | 0.20 [0.11, 0.31] |
| Penaloza 2012, USA cohort | 16 | 138 | 2  | 53 | PE        | outpatients         | Mixed assays                          | 5.1        | 0.89 [0.65, 0.99] | 0.28 [0.22, 0.35] |

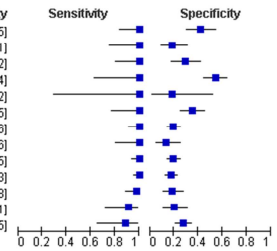

D-dimer test in patients aged 71-80, cut-off age\*10ug/L

| Study                     | TP | FP  | FN | TN | PE or DVT | setting             | assay                                 | Prevalence | Sensitivity       | Specificity       |
|---------------------------|----|-----|----|----|-----------|---------------------|---------------------------------------|------------|-------------------|-------------------|
| Douma 2012, cohort 1      | 17 | 35  | 0  | 27 | DVT       | outpatients         | Quantitative latex aglutination assay | 39.0       | 1.00 [0.80, 1.00] | 0.44 [0.31, 0.57] |
| Douma 2012, cohort 4      | 8  | 23  | 0  | 87 | DVT       | outpatients         | Quantitative latex aglutination assay | 10.0       | 1.00 [0.63, 1.00] | 0.79 [0.70, 0.86] |
| Douma 2012, cohort 5      | 3  | 6   | 0  | 5  | DVT       | outpatients         | Quantitative latex aglutination assay | 37.0       | 1.00 [0.29, 1.00] | 0.45 [0.17, 0.77] |
| Douma 2012, cohort 2      | 13 | 38  | 0  | 21 | DVT       | outpatients         | Quantitative latex aglutination assay | 23.0       | 1.00 [0.75, 1.00] | 0.36 [0.24, 0.49] |
| Douma 2012, cohort 3      | 21 | 29  | 0  | 42 | DVT       | outpatients         | Quantitative latex aglutination assay | 23.0       | 1.00 [0.84, 1.00] | 0.59 [0.47, 0.71] |
| Schouten, 2012            | 14 | 47  | 0  | 20 | DVT       | primary care        | Quantitative latex or ELFA            | 19.7       | 1.00 [0.77, 1.00] | 0.52 [0.41, 0.62] |
| Es, van 2012              | 17 | 31  | 0  | 51 | PE        | in- and outpatients | Quantitative latex aglutination assay | 27.0       | 1.00 [0.80, 1.00] | 0.40 [0.27, 0.55] |
| Douma 2010, valid.set 1   | 40 | 124 | 1  | 80 | PE        | in- and outpatients | Quantitative latex or ELFA            | 20.4       | 0.98 [0.87, 1.00] | 0.39 [0.32, 0.46] |
| Penaloza 2012, Eur cohort | 47 | 57  | 2  | 36 | PE        | outpatients         | Quantitative latex or ELFA            | 18.0       | 0.96 [0.86, 1.00] | 0.39 [0.29, 0.49] |
| Penaloza 2012, USA cohort | 15 | 105 | 3  | 86 | PE        | outpatients         | Mixed assays                          | 5.1        | 0.83 [0.59, 0.96] | 0.45 [0.38, 0.52] |
| Penaloza 2012, French coh | 21 | 37  | 2  | 33 | PE        | outpatients         | Quantitative latex or ELFA            | 28.0       | 0.91 [0.72, 0.99] | 0.47 [0.35, 0.59] |
| Douma 2010, valid.set 2   | 84 | 160 | 1  | 88 | PE        | outpatients         | ELFA                                  | 20.7       | 0.99 [0.94, 1.00] | 0.35 [0.30, 0.42] |
| Douma 2010, derivationset | 57 | 133 | 1  | 74 | PE        | outpatients         | ELFA                                  | 24.2       | 0.98 [0.91, 1.00] | 0.36 [0.29, 0.43] |

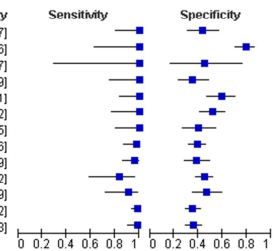

D-dimer test in patients aged >80, cut-off 500 ug/L

| Study                     | TP | FP  | FN | TN | PE or DVT | setting             | assay                                 | Prevalence | Sensitivity       | Specificity       |
|---------------------------|----|-----|----|----|-----------|---------------------|---------------------------------------|------------|-------------------|-------------------|
| Douma 2012, cohort 5      | 2  | 18  | 0  | 2  | DVT       | outpatients         | Quantitative latex aglutination assay | 37.0       | 1.00 [0.16, 1.00] | 0.10 [0.01, 0.32] |
| Douma 2012, cohort 4      | 3  | 26  | 0  | 22 | DVT       | outpatients         | Quantitative latex aglutination assay | 10.0       | 1.00 [0.29, 1.00] | 0.46 [0.31, 0.61] |
| Douma 2012, cohort 1      | 7  | 29  | 0  | 10 | DVT       | outpatients         | Quantitative latex aglutination assay | 39.0       | 1.00 [0.59, 1.00] | 0.26 [0.13, 0.42] |
| Douma 2012, cohort 3      | 6  | 43  | 1  | 10 | DVT       | outpatients         | Quantitative latex aglutination assay | 23.0       | 0.86 [0.42, 1.00] | 0.19 [0.09, 0.32] |
| Douma 2012, cohort 2      | 7  | 57  | 0  | 1  | DVT       | outpatients         | Quantitative latex aglutination assay | 23.0       | 1.00 [0.59, 1.00] | 0.02 [0.00, 0.09] |
| Schouten, 2012            | 6  | 43  | 0  | 13 | DVT       | primary care        | Quantitative latex or ELFA            | 19.7       | 1.00 [0.54, 1.00] | 0.23 [0.13, 0.36] |
| Es, van 2012              | 7  | 20  | 0  | 1  | PE        | in- and outpatients | Quantitative latex aglutination assay | 27.0       | 1.00 [0.59, 1.00] | 0.05 [0.00, 0.24] |
| Douma 2010, valid.set 1   | 33 | 108 | 0  | 25 | PE        | in- and outpatients | Quantitative latex or ELFA            | 20.4       | 1.00 [0.89, 1.00] | 0.19 [0.13, 0.26] |
| Penaloza 2012, Eur cohort | 37 | 92  | 0  | 13 | PE        | outpatients         | Quantitative latex or ELFA            | 18.0       | 1.00 [0.91, 1.00] | 0.12 [0.07, 0.20] |
| Douma 2010, valid.set 2   | 68 | 163 | 0  | 22 | PE        | outpatients         | ELFA                                  | 20.7       | 1.00 [0.95, 1.00] | 0.12 [0.08, 0.17] |
| Douma 2010, derivationset | 43 | 144 | 0  | 11 | PE        | outpatients         | ELFA                                  | 24.2       | 1.00 [0.92, 1.00] | 0.07 [0.04, 0.12] |
| Penaloza 2012, French coh | 17 | 47  | 0  | 3  | PE        | outpatients         | Quantitative latex or ELFA            | 28.0       | 1.00 [0.80, 1.00] | 0.06 [0.01, 0.17] |
| Penaloza 2012, USA cohort | 11 | 83  | 0  | 15 | PE        | outpatients         | Mixed assays                          | 5.1        | 1.00 [0.72, 1.00] | 0.15 [0.09, 0.24] |

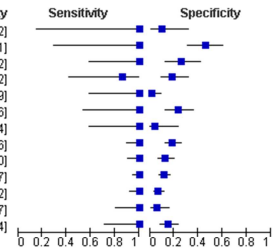

D-dimer test in patients aged >80, cut-off age\*10 ug/L

| Study                     | TP | FP  | FN | TN | PE or DVT | setting             | assay                                 | Prevalence | Sensitivity       | Specificity       |
|---------------------------|----|-----|----|----|-----------|---------------------|---------------------------------------|------------|-------------------|-------------------|
| Douma 2012, cohort 2      | 7  | 43  | 0  | 15 | DVT       | outpatients         | Quantitative latex aglutination assay | 23.0       | 1.00 [0.59, 1.00] | 0.26 [0.15, 0.39] |
| Douma 2012, cohort 3      | 6  | 27  | 1  | 26 | DVT       | outpatients         | Quantitative latex aglutination assay | 23.0       | 0.86 [0.42, 1.00] | 0.49 [0.35, 0.63] |
| Douma 2012, cohort 4      | 3  | 13  | 0  | 35 | DVT       | outpatients         | Quantitative latex aglutination assay | 10.0       | 1.00 [0.29, 1.00] | 0.73 [0.58, 0.85] |
| Douma 2012, cohort 5      | 2  | 9   | 0  | 11 | DVT       | outpatients         | Quantitative latex aglutination assay | 37.0       | 1.00 [0.16, 1.00] | 0.55 [0.32, 0.77] |
| Douma 2012, cohort 1      | 6  | 19  | 1  | 20 | DVT       | outpatients         | Quantitative latex aglutination assay | 39.0       | 0.86 [0.42, 1.00] | 0.51 [0.35, 0.68] |
| Schouten, 2012            | 6  | 34  | 0  | 22 | DVT       | primary care        | Quantitative latex or ELFA            | 19.7       | 1.00 [0.54, 1.00] | 0.39 [0.26, 0.53] |
| Es, van 2012              | 6  | 15  | 1  | 6  | PE        | in- and outpatients | Quantitative latex aglutination assay | 27.0       | 0.86 [0.42, 1.00] | 0.29 [0.11, 0.52] |
| Douma 2010, valid.set 1   | 32 | 86  | 1  | 47 | PE        | in- and outpatients | Quantitative latex or ELFA            | 20.4       | 0.97 [0.84, 1.00] | 0.35 [0.27, 0.44] |
| Penaloza 2012, Eur cohort | 36 | 76  | 1  | 29 | PE        | outpatients         | Quantitative latex or ELFA            | 18.0       | 0.97 [0.86, 1.00] | 0.28 [0.19, 0.37] |
| Penaloza 2012, French coh | 17 | 35  | 0  | 15 | PE        | outpatients         | Quantitative latex or ELFA            | 28.0       | 1.00 [0.80, 1.00] | 0.30 [0.18, 0.45] |
| Penaloza 2012, USA cohort | 9  | 88  | 2  | 30 | PE        | outpatients         | Mixed assays                          | 5.1        | 0.82 [0.48, 0.98] | 0.31 [0.22, 0.41] |
| Douma 2010, derivationset | 43 | 114 | 0  | 41 | PE        | outpatients         | ELFA                                  | 24.2       | 1.00 [0.92, 1.00] | 0.26 [0.20, 0.34] |
| Douma 2010, valid.set 2   | 68 | 131 | 0  | 54 | PE        | outpatients         | ELFA                                  | 20.7       | 1.00 [0.95, 1.00] | 0.29 [0.23, 0.36] |

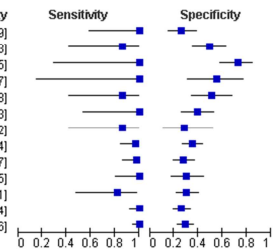

## Appendix 5- Hypothetical 2x2 tables for patients with suspected venous thromboembolism (VTE) within hypothetical cohorts with a median, low and high prevalence of VTE

### With a median prevalence in patients with a non-high clinical probability of VTE

| Hypothetical 2x2 tabs                                                        | ≤50 years |      |       |         | 51-60 years |       |       |         | 61-70 years |      |       |         | 71-80 years |      |       |         | >80 years |      |       |         |  |  |  |
|------------------------------------------------------------------------------|-----------|------|-------|---------|-------------|-------|-------|---------|-------------|------|-------|---------|-------------|------|-------|---------|-----------|------|-------|---------|--|--|--|
| Conventional cut-off value                                                   | VTE +     | VTE- | Total | PPV/NPV | VTE +       | VTE-  | Total | PPV/NPV | PPV/NPV     | VTE- | Total | PPV/NPV | VTE +       | VTE- | Total | PPV/NPV | VTE +     | VTE- | Total | PPV/NPV |  |  |  |
| D-dimer high                                                                 | 120       | 291  | 411   | 29.2    | 134         | 367   | 501   | 26.7    | 154         | 512  | 666   | 23.2    | 212         | 593  | 805   | 26.4    | 151       | 724  | 876   | 17.3    |  |  |  |
| D-dimer low                                                                  | 3         | 586  | 589   | 99.5    | 0           | 499   | 499   | 100.0   | 2           | 332  | 334   | 99.5    | 3           | 192  | 195   | 98.5    | 1         | 124  | 124   | 99.5    |  |  |  |
| Total                                                                        | 123       | 877  | 1,000 |         | 134         | 866   | 1,000 |         | 156         | 844  | 1,000 |         | 215         | 785  | 1,000 |         | 152       | 848  | 1,000 |         |  |  |  |
| Sensitivity/specificity                                                      | 97.6      | 66.8 |       |         | 100.0       | 57.6  |       |         | 99.0        | 39.4 |       |         | 98.7        | 24.5 |       |         | 99.6      | 14.6 |       |         |  |  |  |
| Age adjusted cut-off value                                                   | VTE +     | VTE- | Total | PPV/NPV | VTE +       | VTE-  | Total | PPV/NPV | VTE +       | VTE- | Total | PPV/NPV | VTE +       | VTE- | Total | PPV/NPV | VTE +     | VTE- | Total | PPV/NPV |  |  |  |
| D-dimer high                                                                 |           |      |       |         | 133         | 327   | 460   | 28.9    | 152         | 427  | 578   | 26.2    | 209         | 438  | 648   | 32.3    | 147       | 550  | 697   | 21.2    |  |  |  |
| D-dimer low                                                                  |           |      |       |         | 1           | 539   | 540   | 99.8    | 4           | 417  | 422   | 99.0    | 6           | 347  | 352   | 98.4    | 5         | 298  | 303   | 98.5    |  |  |  |
| Total                                                                        |           |      |       |         | 134         | 866   | 1,000 |         | 156         | 844  | 1,000 |         | 215         | 785  | 1,000 |         | 152       | 848  | 1,000 |         |  |  |  |
| Sensitivity/specificity                                                      |           |      |       |         | 99.4        | 62.3  |       |         | 97.3        | 49.5 |       |         | 97.3        | 44.2 |       |         | 97.0      | 35.2 |       |         |  |  |  |
| <b>Number of reclassified patients</b>                                       |           |      |       |         | 1           | 40    |       |         | 2           | 85   |       |         | 3           | 155  |       |         | 4         | 175  |       |         |  |  |  |
| <b>SCENARIO HYPOTHETICAL 2X2; LOWER LIMIT CONFIDENCE INTERVALS SENS/SPEC</b> |           |      |       |         |             |       |       |         |             |      |       |         |             |      |       |         |           |      |       |         |  |  |  |
| Hypothetical 2x2 tabs                                                        | ≤50 years |      |       |         | 51-60 years |       |       |         | 61-70 years |      |       |         | 71-80 years |      |       |         | >80 years |      |       |         |  |  |  |
| Conventional cut-off value                                                   | VTE +     | VTE- | Total | PPV/NPV | VTE +       | VTE-  | Total | PPV/NPV | VTE +       | VTE- | Total | PPV/NPV | VTE +       | VTE- | Total | PPV/NPV | VTE +     | VTE- | Total | PPV/NPV |  |  |  |
| D-dimer high                                                                 | 117       | 340  | 456   | 25.6    | 134         | 421   | 555   | 24.1    | 151         | 561  | 712   | 21.2    | 207         | 628  | 835   | 24.8    | 147       | 752  | 899   | 16.4    |  |  |  |
| D-dimer low                                                                  | 6         | 537  | 544   | 98.9    | 0           | 445   | 445   | 100.0   | 5           | 283  | 288   | 98.1    | 8           | 157  | 165   | 95.4    | 5         | 96   | 101   | 95.3    |  |  |  |
| Total                                                                        | 123       | 877  | 1000  |         | 134         | 866   | 1,000 |         | 156         | 844  | 1,000 |         | 215         | 785  | 1,000 |         | 152       | 848  | 1,000 |         |  |  |  |
| Sensitivity/specificity                                                      | 95.0      | 61.3 |       |         | 100.0       | 51.4  |       |         | 96.6        | 33.5 |       |         | 96.5        | 20.0 |       |         | 96.9      | 11.3 |       |         |  |  |  |
| Age adjusted cut-off value                                                   | VTE +     | VTE- | Total | PPV/NPV | VTE +       | VTE-  | Total | PPV/NPV | VTE +       | VTE- | Total | PPV/NPV | VTE +       | VTE- | Total | PPV/NPV | VTE +     | VTE- | Total | PPV/NPV |  |  |  |
| D-dimer high                                                                 |           |      |       |         | 130         | 380   | 510   | 25.6    | 146         | 480  | 626   | 23.4    | 203         | 487  | 689   | 29.4    | 141       | 599  | 740   | 19.1    |  |  |  |
| D-dimer low                                                                  |           |      |       |         | 4           | 486   | 490   | 99.2    | 10          | 364  | 374   | 97.4    | 12          | 298  | 311   | 96.0    | 11        | 249  | 260   | 95.9    |  |  |  |
| Total                                                                        |           |      |       |         | 134         | 866   | 1,000 |         | 156         | 844  | 1,000 |         | 215         | 785  | 1,000 |         | 152       | 848  | 1,000 |         |  |  |  |
| Sensitivity/specificity                                                      |           |      |       |         | 97.3        | 56.2  |       |         | 93.8        | 43.2 |       |         | 94.3        | 38.0 |       |         | 92.9      | 29.4 |       |         |  |  |  |
| <b>Number of reclassified patients</b>                                       |           |      |       |         | 4           | 41    |       |         | 5           | 81   |       |         | 4           | 141  |       |         | 6         | 153  |       |         |  |  |  |
| <b>SCENARIO HYPOTHETICAL 2X2; UPPER LIMIT CONFIDENCE INTERVALS SENS/SPEC</b> |           |      |       |         |             |       |       |         |             |      |       |         |             |      |       |         |           |      |       |         |  |  |  |
| Hypothetical 2x2 tabs                                                        | ≤50 years |      |       |         | 51-60 years |       |       |         | 61-70 years |      |       |         | 71-80 years |      |       |         | >80 years |      |       |         |  |  |  |
| Conventional cut-off value                                                   | VTE +     | VTE- | Total | PPV/NPV | VTE +       | VTE-  | Total | PPV/NPV | VTE +       | VTE- | Total | PPV/NPV | VTE +       | VTE- | Total | PPV/NPV | VTE +     | VTE- | Total | PPV/NPV |  |  |  |
| D-dimer high                                                                 | 122       | 246  | 368   | 33.1    | 134         | 315   | 449   | 29.8    | 156         | 459  | 615   | 25.3    | 214         | 552  | 766   | 27.9    | 152       | 690  | 842   | 18.0    |  |  |  |
| D-dimer low                                                                  | 1         | 631  | 632   | 99.8    | 0           | 551   | 551   | 100.0   | 0           | 385  | 385   | 99.9    | 1           | 233  | 234   | 99.6    | 0         | 158  | 158   | 99.9    |  |  |  |
| Total                                                                        | 123       | 877  | 1000  |         | 134         | 866   | 1,000 |         | 156         | 844  | 1,000 |         | 215         | 785  | 1,000 |         | 152       | 848  | 1,000 |         |  |  |  |
| Sensitivity/specificity                                                      | 98.9      | 72.0 |       |         | 100.0       | 63.6  |       |         | 99.7        | 45.6 |       |         | 99.5        | 29.7 |       |         | 99.9      | 18.6 |       |         |  |  |  |
| Age adjusted cut-off value                                                   | VTE +     | VTE- | Total | PPV/NPV | VTE +       | VTE-  | Total | PPV/NPV | VTE +       | VTE- | Total | PPV/NPV | VTE +       | VTE- | Total | PPV/NPV | VTE +     | VTE- | Total | PPV/NPV |  |  |  |
| D-dimer high                                                                 |           |      |       |         | 134         | 277   | 411   | 32.6    | 154         | 373  | 527   | 29.2    | 212         | 388  | 601   | 35.4    | 150       | 496  | 647   | 23.2    |  |  |  |
| D-dimer low                                                                  |           |      |       |         | 0           | 589   | 589   | 100.0   | 2           | 471  | 473   | 99.6    | 3           | 397  | 399   | 99.3    | 2         | 352  | 353   | 99.5    |  |  |  |
| Total                                                                        |           |      |       |         | 134         | 866.0 | 1,000 |         | 156         | 844  | 1,000 |         | 215         | 785  | 1,000 |         | 152       | 848  | 1,000 |         |  |  |  |
| Sensitivity/specificity                                                      |           |      |       |         | 99.9        | 68.0  |       |         | 98.8        | 55.8 |       |         | 98.8        | 50.5 |       |         | 98.8      | 41.5 |       |         |  |  |  |
| <b>Number of reclassified patients</b>                                       |           |      |       |         | 0           | 38    |       |         | 2           | 86   |       |         | 2           | 164  |       |         | 2         | 194  |       |         |  |  |  |

**Appendix 5 (continued) - Hypothetical 2x2 tables for patients with suspected venous thromboembolism (VTE) within hypothetical cohorts with a median, low and high prevalence of VTE**

**With the lowest (MINIMAL) prevalence in patients with a non-high clinical probability of VTE**

| Hypothetical 2x2 tabs                                                        | ≤50 years |      |       |         | 51-60 years |       |       |         | 61-70 years |      |       |         | 71-80 years |      |       |         | >80 years |      |       |         |     |  |  |  |
|------------------------------------------------------------------------------|-----------|------|-------|---------|-------------|-------|-------|---------|-------------|------|-------|---------|-------------|------|-------|---------|-----------|------|-------|---------|-----|--|--|--|
| Conventional cut-off value                                                   | VTE +     | VTE- | Total | PPV/NPV | VTE +       | VTE-  | Total | PPV/NPV | VTE +       | VTE- | Total | PPV/NPV | VTE +       | VTE- | Total | PPV/NPV | VTE +     | VTE- | Total | PPV/NPV |     |  |  |  |
| D-dimer high                                                                 | 30        | 322  | 352   | 8.6     | 50          | 403   | 453   | 11.0    | 65          | 566  | 631   | 10.3    | 67          | 703  | 771   | 8.7     | 59        | 804  | 863   | 6.8     |     |  |  |  |
| D-dimer low                                                                  | 1         | 647  | 648   | 99.9    | 0           | 547   | 547   | 100.0   | 1           | 368  | 369   | 99.8    | 1           | 229  | 229   | 99.6    | 0         | 137  | 137   | 99.8    |     |  |  |  |
| Total                                                                        | 31        | 969  | 1000  |         | 50          | 950   | 1,000 |         | 66          | 934  | 1,000 |         | 68          | 932  | 1,000 |         | 59        | 941  | 1,000 |         |     |  |  |  |
| Sensitivity/specificity                                                      | 97.6      | 66.8 |       |         | 100.0       | 57.6  |       |         | 99.0        | 39.4 |       |         | 98.7        | 24.5 |       |         | 99.6      | 14.6 |       |         |     |  |  |  |
| Age adjusted cut-off value                                                   | VTE +     | VTE- | Total | PPV/NPV | VTE +       | VTE-  | Total | PPV/NPV | VTE +       | VTE- | Total | PPV/NPV | VTE +       | VTE- | Total | PPV/NPV | VTE +     | VTE- | Total | PPV/NPV |     |  |  |  |
| D-dimer high                                                                 |           |      |       |         | 50          | 359   | 408   | 12.2    | 64          | 472  | 536   | 12.0    | 66          | 520  | 587   | 11.3    | 57        | 610  | 667   | 8.6     |     |  |  |  |
| D-dimer low                                                                  |           |      |       |         | 0           | 591   | 592   | 99.9    | 2           | 462  | 464   | 99.6    | 2           | 412  | 413   | 99.6    | 2         | 331  | 333   | 99.5    |     |  |  |  |
| Total                                                                        |           |      |       |         | 50          | 950   | 1,000 |         | 66          | 934  | 1,000 |         | 68          | 932  | 1,000 |         | 59        | 941  | 1,000 |         |     |  |  |  |
| Sensitivity/specificity                                                      |           |      |       |         | 99.4        | 62.3  |       |         | 97.3        | 49.5 |       |         | 97.3        | 44.2 |       |         | 97.0      | 35.2 |       |         |     |  |  |  |
| <b>Number of reclassified patients</b>                                       |           |      |       |         | 0           | 44    |       |         |             | 1    | 94    |         |             |      | 1     | 183     |           |      |       | 2       | 194 |  |  |  |
| <b>SCENARIO HYPOTHETICAL 2X2; LOWER LIMIT CONFIDENCE INTERVALS SENS/SPEC</b> |           |      |       |         |             |       |       |         |             |      |       |         |             |      |       |         |           |      |       |         |     |  |  |  |
| Hypothetical 2x2 tabs                                                        | ≤50 years |      |       |         | 51-60 years |       |       |         | 61-70 years |      |       |         | 71-80 years |      |       |         | >80 years |      |       |         |     |  |  |  |
| Conventional cut-off value                                                   | VTE +     | VTE- | Total | PPV/NPV | VTE +       | VTE-  | Total | PPV/NPV | VTE +       | VTE- | Total | PPV/NPV | VTE +       | VTE- | Total | PPV/NPV | VTE +     | VTE- | Total | PPV/NPV |     |  |  |  |
| D-dimer high                                                                 | 29        | 375  | 405   | 7.3     | 50          | 462   | 512   | 9.8     | 64          | 621  | 685   | 9.3     | 66          | 746  | 811   | 8.1     | 57        | 835  | 892   | 6.4     |     |  |  |  |
| D-dimer low                                                                  | 2         | 594  | 595   | 99.7    | 0           | 488   | 488   | 100.0   | 2           | 313  | 315   | 99.3    | 2           | 186  | 189   | 98.7    | 2         | 106  | 108   | 98.3    |     |  |  |  |
| Total                                                                        | 31        | 969  | 1000  |         | 50          | 950   | 1,000 |         | 66          | 934  | 1,000 |         | 68          | 932  | 1,000 |         | 59        | 941  | 1,000 |         |     |  |  |  |
| Sensitivity/specificity                                                      | 95.0      | 61.3 |       |         | 100.0       | 51.4  |       |         | 96.6        | 33.5 |       |         | 96.5        | 20.0 |       |         | 96.9      | 11.3 |       |         |     |  |  |  |
| Age adjusted cut-off value                                                   | VTE +     | VTE- | Total | PPV/NPV | VTE +       | VTE-  | Total | PPV/NPV | VTE +       | VTE- | Total | PPV/NPV | VTE +       | VTE- | Total | PPV/NPV | VTE +     | VTE- | Total | PPV/NPV |     |  |  |  |
| D-dimer high                                                                 |           |      |       |         | 49          | 416   | 465   | 10.5    | 62          | 531  | 593   | 10.4    | 64          | 578  | 642   | 10.0    | 55        | 665  | 720   | 7.6     |     |  |  |  |
| D-dimer low                                                                  |           |      |       |         | 1           | 534   | 535   | 99.7    | 4           | 403  | 407   | 99.0    | 4           | 354  | 358   | 98.9    | 4         | 276  | 280   | 98.5    |     |  |  |  |
| Total                                                                        |           |      |       |         | 50          | 950   | 1,000 |         | 66          | 934  | 1,000 |         | 68          | 932  | 1,000 |         | 59        | 941  | 1,000 |         |     |  |  |  |
| Sensitivity/specificity                                                      |           |      |       |         | 97.3        | 56.2  |       |         | 93.8        | 43.2 |       |         | 94.3        | 38.0 |       |         | 92.9      | 29.4 |       |         |     |  |  |  |
| <b>Number of reclassified patients</b>                                       |           |      |       |         | 1           | 46    |       |         |             | 2    | 90    |         |             |      | 2     | 168     |           |      |       | 2       | 170 |  |  |  |
| <b>SCENARIO HYPOTHETICAL 2X2; UPPER LIMIT CONFIDENCE INTERVALS SENS/SPEC</b> |           |      |       |         |             |       |       |         |             |      |       |         |             |      |       |         |           |      |       |         |     |  |  |  |
| Hypothetical 2x2 tabs                                                        | ≤50 years |      |       |         | 51-60 years |       |       |         | 61-70 years |      |       |         | 71-80 years |      |       |         | >80 years |      |       |         |     |  |  |  |
| Conventional cut-off value                                                   | VTE +     | VTE- | Total | PPV/NPV | VTE +       | VTE-  | Total | PPV/NPV | VTE +       | VTE- | Total | PPV/NPV | VTE +       | VTE- | Total | PPV/NPV | VTE +     | VTE- | Total | PPV/NPV |     |  |  |  |
| D-dimer high                                                                 | 31        | 272  | 302   | 10.1    | 50          | 346   | 396   | 12.6    | 66          | 508  | 574   | 11.5    | 68          | 655  | 723   | 9.4     | 59        | 766  | 825   | 7.1     |     |  |  |  |
| D-dimer low                                                                  | 0         | 697  | 698   | 99.9    | 0           | 604   | 604   | 100.0   | 0           | 426  | 426   | 100.0   | 0           | 277  | 277   | 99.9    | 0         | 175  | 175   | 100.0   |     |  |  |  |
| Total                                                                        | 31        | 969  | 1000  |         | 50          | 950   | 1,000 |         | 66          | 934  | 1,000 |         | 68          | 932  | 1,000 |         | 59        | 941  | 1,000 |         |     |  |  |  |
| Sensitivity/specificity                                                      | 98.9      | 72.0 | 1000  |         | 100.0       | 63.6  |       |         | 99.7        | 45.6 |       |         | 99.5        | 29.7 |       |         | 99.9      | 18.6 |       |         |     |  |  |  |
| Age adjusted cut-off value                                                   | VTE +     | VTE- | Total | PPV/NPV | VTE +       | VTE-  | Total | PPV/NPV | VTE +       | VTE- | Total | PPV/NPV | VTE +       | VTE- | Total | PPV/NPV | VTE +     | VTE- | Total | PPV/NPV |     |  |  |  |
| D-dimer high                                                                 |           |      |       |         | 50          | 304   | 354   | 14.1    | 65          | 413  | 478   | 13.6    | 67          | 461  | 528   | 12.7    | 58        | 551  | 609   | 9.6     |     |  |  |  |
| D-dimer low                                                                  |           |      |       |         | 0           | 646   | 646   | 100.0   | 1           | 521  | 522   | 99.9    | 1           | 471  | 472   | 99.8    | 1         | 390  | 391   | 99.8    |     |  |  |  |
| Total                                                                        |           |      |       |         | 50          | 950.0 | 1,000 |         | 66          | 934  | 1,000 |         | 68          | 932  | 1,000 |         | 59        | 941  | 1,000 |         |     |  |  |  |
| Sensitivity/specificity                                                      |           |      |       |         | 99.9        | 68.0  |       |         | 98.8        | 55.8 |       |         | 98.8        | 50.5 |       |         | 98.8      | 41.5 |       |         |     |  |  |  |
| <b>Number of reclassified patients</b>                                       |           |      |       |         | 0           | 42    |       |         |             | 1    | 95    |         |             |      | 1     | 194     |           |      |       | 1       | 215 |  |  |  |

**Appendix 5 (continued) - Hypothetical 2x2 tables for patients with suspected venous thromboembolism (VTE) within hypothetical cohorts with a median, low and high prevalence of VTE**

**With the highest (MAXIMAL) prevalence in patients with a non-high clinical probability of VTE**

| Hypothetical 2x2 tabs                                                        | ≤50 years |      |       |         | 51-60 years |       |       |         | 61-70 years |      |       |         | 71-80 years |      |       |         | >80 years |      |       |         |  |  |    |     |
|------------------------------------------------------------------------------|-----------|------|-------|---------|-------------|-------|-------|---------|-------------|------|-------|---------|-------------|------|-------|---------|-----------|------|-------|---------|--|--|----|-----|
| Conventional cut-off value                                                   | VTE +     | VTE- | Total | PPV/NPV | VTE +       | VTE-  | Total | PPV/NPV | VTE +       | VTE- | Total | PPV/NPV | VTE +       | VTE- | Total | PPV/NPV | VTE +     | VTE- | Total | PPV/NPV |  |  |    |     |
| D-dimer high                                                                 | 279       | 237  | 516   | 54.1    | 333         | 283   | 616   | 54.1    | 259         | 557  | 816   | 31.7    | 340         | 494  | 835   | 40.8    | 268       | 624  | 892   | 30.0    |  |  |    |     |
| D-dimer low                                                                  | 7         | 477  | 484   | 98.6    | 0           | 384   | 384   | 100.0   | 3           | 181  | 184   | 98.1    | 5           | 161  | 165   | 97.2    | 1         | 107  | 108   | 99.0    |  |  |    |     |
| Total                                                                        | 286       | 714  | 1000  |         | 333         | 667   | 1,000 |         | 262         | 738  | 1,000 |         | 345         | 655  | 1,000 |         | 269       | 731  | 1,000 |         |  |  |    |     |
| Sensitivity/specificity                                                      | 97.6      | 66.8 |       |         | 100.0       | 57.6  |       |         | 98.7        | 24.5 |       |         | 98.7        | 24.5 |       |         | 99.6      | 14.6 |       |         |  |  |    |     |
| Age adjusted cut-off value                                                   | VTE +     | VTE- | Total | PPV/NPV | VTE +       | VTE-  | Total | PPV/NPV | VTE +       | VTE- | Total | PPV/NPV | VTE +       | VTE- | Total | PPV/NPV | VTE +     | VTE- | Total | PPV/NPV |  |  |    |     |
| D-dimer high                                                                 |           |      |       |         | 331         | 252   | 583   | 56.8    | 255         | 412  | 667   | 38.2    | 336         | 366  | 702   | 47.9    | 261       | 474  | 735   | 35.5    |  |  |    |     |
| D-dimer low                                                                  |           |      |       |         | 2           | 415   | 417   | 99.5    | 7           | 326  | 333   | 97.9    | 9           | 289  | 298   | 96.9    | 8         | 257  | 265   | 97.0    |  |  |    |     |
| Total                                                                        |           |      |       |         | 333         | 667   | 1,000 |         | 262         | 738  | 1,000 |         | 345         | 655  | 1,000 |         | 269       | 731  | 1,000 |         |  |  |    |     |
| Sensitivity/specificity                                                      |           |      |       |         | 99.4        | 62.3  |       |         | 97.3        | 44.2 |       |         | 97.3        | 44.2 |       |         | 97.0      | 35.2 |       |         |  |  |    |     |
| <b>Number of reclassified patients</b>                                       |           |      |       |         | 2           | 31    |       |         |             |      | 4     | 145     |             |      |       |         | 4         | 128  |       |         |  |  | 7  | 150 |
| <b>SCENARIO HYPOTHETICAL 2X2; LOWER LIMIT CONFIDENCE INTERVALS SENS/SPEC</b> |           |      |       |         |             |       |       |         |             |      |       |         |             |      |       |         |           |      |       |         |  |  |    |     |
| Hypothetical 2x2 tabs                                                        | ≤50 years |      |       |         | 51-60 years |       |       |         | 61-70 years |      |       |         | 71-80 years |      |       |         | >80 years |      |       |         |  |  |    |     |
| Conventional cut-off value                                                   | VTE +     | VTE- | Total | PPV/NPV | VTE +       | VTE-  | Total | PPV/NPV | VTE +       | VTE- | Total | PPV/NPV | VTE +       | VTE- | Total | PPV/NPV | VTE +     | VTE- | Total | PPV/NPV |  |  |    |     |
| D-dimer high                                                                 | 272       | 277  | 548   | 49.6    | 333         | 324   | 657   | 50.7    | 265         | 580  | 845   | 31.4    | 292         | 558  | 850   | 34.4    | 261       | 648  | 909   | 28.7    |  |  |    |     |
| D-dimer low                                                                  | 14        | 437  | 452   | 96.8    | 0           | 343   | 343   | 100.0   | 10          | 145  | 155   | 93.7    | 11          | 139  | 150   | 92.9    | 8         | 83   | 91    | 90.9    |  |  |    |     |
| Total                                                                        | 286       | 714  | 1000  |         | 333         | 667   | 1,000 |         | 275         | 725  | 1,000 |         | 303         | 697  | 1,000 |         | 269       | 731  | 1,000 |         |  |  |    |     |
| Sensitivity/specificity                                                      | 95.0      | 61.3 |       |         | 100.0       | 51.4  |       |         | 96.5        | 20.0 |       |         | 96.5        | 20.0 |       |         | 96.9      | 11.3 |       |         |  |  |    |     |
| Age adjusted cut-off value                                                   | VTE +     | VTE- | Total | PPV/NPV | VTE +       | VTE-  | Total | PPV/NPV | VTE +       | VTE- | Total | PPV/NPV | VTE +       | VTE- | Total | PPV/NPV | VTE +     | VTE- | Total | PPV/NPV |  |  |    |     |
| D-dimer high                                                                 |           |      |       |         | 324         | 292   | 616   | 52.6    | 259         | 449  | 709   | 36.6    | 286         | 432  | 718   | 39.8    | 250       | 516  | 766   | 32.6    |  |  |    |     |
| D-dimer low                                                                  |           |      |       |         | 9           | 375   | 384   | 97.6    | 16          | 276  | 291   | 94.6    | 17          | 265  | 282   | 93.8    | 19        | 215  | 234   | 91.9    |  |  |    |     |
| Total                                                                        |           |      |       |         | 333         | 667   | 1,000 |         | 275         | 725  | 1,000 |         | 303         | 697  | 1,000 |         | 269       | 731  | 1,000 |         |  |  |    |     |
| Sensitivity/specificity                                                      |           |      |       |         | 97.3        | 56.2  |       |         | 94.3        | 38.0 |       |         | 94.3        | 38.0 |       |         | 92.9      | 29.4 |       |         |  |  |    |     |
| <b>Number of reclassified patients</b>                                       |           |      |       |         | 9           | 32    |       |         |             |      | 6     | 131     |             |      |       |         | 6         | 126  |       |         |  |  | 11 | 132 |
| <b>SCENARIO HYPOTHETICAL 2X2; UPPER LIMIT CONFIDENCE INTERVALS SENS/SPEC</b> |           |      |       |         |             |       |       |         |             |      |       |         |             |      |       |         |           |      |       |         |  |  |    |     |
| Hypothetical 2x2 tabs                                                        | ≤50 years |      |       |         | 51-60 years |       |       |         | 61-70 years |      |       |         | 71-80 years |      |       |         | >80 years |      |       |         |  |  |    |     |
| Conventional cut-off value                                                   | VTE +     | VTE- | Total | PPV/NPV | VTE +       | VTE-  | Total | PPV/NPV | VTE +       | VTE- | Total | PPV/NPV | VTE +       | VTE- | Total | PPV/NPV | VTE +     | VTE- | Total | PPV/NPV |  |  |    |     |
| D-dimer high                                                                 | 283       | 200  | 483   | 58.5    | 333         | 243   | 576   | 57.8    | 274         | 510  | 784   | 34.9    | 302         | 490  | 792   | 38.1    | 269       | 595  | 864   | 31.1    |  |  |    |     |
| D-dimer low                                                                  | 3         | 514  | 517   | 99.4    | 0           | 424   | 424   | 100.0   | 1           | 215  | 217   | 99.4    | 1           | 207  | 208   | 99.3    | 0         | 136  | 136   | 99.9    |  |  |    |     |
| Total                                                                        | 286       | 714  | 1000  |         | 333         | 667   | 1,000 |         | 275         | 725  | 1,000 |         | 303         | 697  | 1,000 |         | 269       | 731  | 1,000 |         |  |  |    |     |
| Sensitivity/specificity                                                      | 98.9      | 72.0 |       |         | 100.0       | 63.6  |       |         | 99.5        | 29.7 |       |         | 99.5        | 29.7 |       |         | 99.9      | 18.6 |       |         |  |  |    |     |
| Age adjusted cut-off value                                                   | VTE +     | VTE- | Total | PPV/NPV | VTE +       | VTE-  | Total | PPV/NPV | VTE +       | VTE- | Total | PPV/NPV | VTE +       | VTE- | Total | PPV/NPV | VTE +     | VTE- | Total | PPV/NPV |  |  |    |     |
| D-dimer high                                                                 |           |      |       |         | 333         | 214   | 546   | 60.9    | 272         | 359  | 630   | 43.1    | 299         | 345  | 644   | 46.5    | 266       | 428  | 694   | 38.3    |  |  |    |     |
| D-dimer low                                                                  |           |      |       |         | 0           | 453   | 454   | 99.9    | 3           | 366  | 370   | 99.1    | 4           | 352  | 356   | 99.0    | 3         | 303  | 306   | 98.9    |  |  |    |     |
| Total                                                                        |           |      |       |         | 333         | 667.0 | 1,000 |         | 275         | 725  | 1,000 |         | 303         | 697  | 1,000 |         | 269       | 731  | 1,000 |         |  |  |    |     |
| Sensitivity/specificity                                                      |           |      |       |         | 99.9        | 68.0  |       |         | 98.8        | 50.5 |       |         | 98.8        | 50.5 |       |         | 98.8      | 41.5 |       |         |  |  |    |     |
| <b>Number of reclassified patients</b>                                       |           |      |       |         | 0           | 29    |       |         |             |      | 2     | 151     |             |      |       |         | 3         | 145  |       |         |  |  | 3  | 167 |
